# Supplementary material for: Putative LysM Effectors Contribute to Fungal Lifestyle
Source: MDPI journal article supplement (doi:10.3390/ijms22063147), 2021-03-19
Supplement: s1 [file s1]

## Supplementary Tables

**Supplementary Table 1.** NCBI BioProject, Proteome size, Number of proteins containing LysM domains and percentage of proteins containing LysM domains of *P. chlamydosporia* 123 and 32 other organisms with different lifestyles.

| NCBI Bioproject        | Organism                                                        | Main lifestyle   | Proteins with LysM domain(s) |
|------------------------|-----------------------------------------------------------------|------------------|------------------------------|
| PRJNA571622            | <i>Armillaria mellea</i>                                        | Phytopathogenic  | 0                            |
| PRJNA41495/PRJNA245119 | <i>Arthrobotrys oligospora</i> ATCC 24927                       | Nematophagous    | 16                           |
| PRJNA18467             | <i>Aspergillus clavatus</i> NRRL 1                              | Saprophytic      | 6                            |
| PRJNA19263             | <i>Aspergillus niger</i> CBS 513.88                             | Saprophytic      | 12                           |
| PRJNA88495             | <i>Aspergillus oryzae</i> 3.042                                 | Saprophytic      | 11                           |
| PRJNA221345            | <i>Balansia obtecta</i>                                         | Endophytic       | 0                            |
| PRJNA38719/PRJNA225503 | <i>Beauveria bassiana</i> ARSEF 2860                            | Entomopathogenic | 17                           |
| PRJNA28821             | <i>Blumeria graminis</i> f. sp. hordei DH14                     | Phytopathogenic  | 1                            |
| PRJNA183607            | <i>Blumeria graminis</i> f. sp. tritici 96224                   | Phytopathogenic  | 1                            |
| PRJNA20061             | <i>Botryotinia fuckeliana</i> = <i>Botrytis cinerea</i> B05.10  | Phytopathogenic  | 5                            |
| PRJEA76493             | <i>Claviceps purpurea</i> 20.1                                  | Phytopathogenic  | 5                            |
| PRJNA37879/PRJNA225514 | <i>Colletotrichum graminicola</i> M1.001                        | Phytopathogenic  | 19                           |
| PRJNA47061/PRJNA342684 | <i>Colletotrichum higginsianum</i> IMI 349063                   | Phytopathogenic  | 24                           |
| PRJNA41129/PRJNA225510 | <i>Cordyceps militaris</i> CM01                                 | Entomopathogenic | 24                           |
| PRJNA277234            | <i>Drechmeria coniospora</i>                                    | Nematophagous    | 6                            |
| PRJNA593223            | <i>Epichloe coenophiala</i>                                     | Endophytic       | 0                            |
| PRJNA42133             | <i>Eplchloë festucae</i> E2368                                  | Endophytic       | 0                            |
| PRJNA243               | <i>Fusarium graminearum</i> PH-1                                | Phytopathogenic  | 14                           |
| PRJNA174274            | <i>Fusarium oxysporum</i> (FOCTR1)                              | Phytopathogenic  | 13                           |
| PRJNA51499             | <i>Fusarium solani</i> = <i>Nectria hematococca</i> mpVI77-13-4 | Phytopathogenic  | 17                           |
| PRJNA360877            | <i>Gymnosporangium juniperus-virginiae</i>                      | Phytopathogenic  | 0                            |
| PRJNA352455            | <i>Hirsutella rhossiliensis</i>                                 | Nematophagous    | 0                            |

|                        |                                                                    |                  |    |
|------------------------|--------------------------------------------------------------------|------------------|----|
| PRJNA242986            | <i>Hypocrella siamensis</i>                                        | Entomopathogenic | 13 |
| PRJNA13835             | <i>Kluyveromyces lactis</i> NRRL Y-1140                            | Saprophytic      | 1  |
| PRJNA29019             | <i>Laccaria bicolor</i> S238N-H82                                  | Mycorrhizal      | 8  |
| PRJNA13840/PRJNA1433   | <i>Magnaporthe oryzae</i> = <i>Pyricularia oryzae</i> 70-15        | Phytopathogenic  | 12 |
| PRJNA38715/PRJNA245139 | <i>Metarhizium acridum</i> CQMa 102                                | Entomopathogenic | 10 |
|                        | <i>Metarhizium anisopliae</i> = <i>Metarhizium robertsii</i> ARSEF |                  |    |
| PRJNA38717/PRJNA245140 | 23                                                                 | Entomopathogenic | 21 |
| PRJNA132               | <i>Neurospora crassa</i> OR74A                                     | Saprophytic      | 9  |
| PRJNA353947            | <i>Peronospora belbahrii</i>                                       | Phytopathogenic  | 0  |
| PRJNA391849            | <i>Peronospora destructor</i>                                      | Phytopathogenic  | 0  |
| PRJNA453556            | <i>Peronospora effusa</i>                                          | Phytopathogenic  | 1  |
| PRJNA285243            | <i>Peronospora tabacina</i>                                        | Phytopathogenic  | 0  |
| PRJNA290406            | <i>Phytophthora litchii</i>                                        | Phytopathogenic  | 0  |
| PRJEA76339             | <i>Piriformospora indica</i> = <i>Serendipita indica</i>           | Endophytic       | 23 |
| PRJNA327267            | <i>Pleurotus ostreatus</i>                                         | Nematophagous    | 8  |
| PRJNA68669             | <i>Pochonia chlamydosporia</i> 123                                 | Nematophagous    | 13 |
| PRJNA560630            | <i>Pochonia chlamydosporia</i> 170                                 | Nematophagous    | 12 |
| PRJNA398546            | <i>Puccinia coronata</i> f. sp. avenae                             | Phytopathogenic  | 10 |
| PRJNA18535             | <i>Puccinia graminis</i> f. sp. tritici CRL 75-36-700-3            | Phytopathogenic  | 2  |
| PRJNA661348            | <i>Puccinia kuehnii</i>                                            | Phytopathogenic  | 0  |
| PRJNA507656            | <i>Puccinia novopanici</i>                                         | Phytopathogenic  | 0  |
| PRJNA277993            | <i>Puccinia sorghi</i>                                             | Phytopathogenic  | 2  |
| PRJNA595755            | <i>Puccinia striiformis</i>                                        | Phytopathogenic  | 6  |
| PRJNA694214            | <i>Puccinia triticina</i>                                          | Phytopathogenic  | 0  |
| PRJNA128               | <i>Saccharomyces cerevisiae</i> S288C                              | Saprophytic      | 0  |
| PRJNA127               | <i>Schizosaccharomyces pombe</i> 972h-                             | Saprophytic      | 1  |
| PRJNA207844            | <i>Serendipita vermifera</i> MAFF 305830                           | Endophytic       | 16 |
| PRJNA19867/PRJNA264112 | <i>Trichoderma atroviride</i> IMI 206040                           | Mycopathogenic   | 16 |

|                        |                                                                        |                 |    |
|------------------------|------------------------------------------------------------------------|-----------------|----|
| PRJNA15571/PRJNA225530 | <i>Trichoderma reesei</i> QM6a                                         | Mycopathogenic  | 9  |
| PRJNA19983/PRJNA264113 | <i>Trichoderma virens</i> Gv29-8                                       | Mycopathogenic  | 20 |
| PRJEA79049             | <i>Ustilago hordei</i>                                                 | Phytopathogenic | 2  |
| PRJNA14007             | <i>Ustilago maidis</i> 521                                             | Phytopathogenic | 2  |
| PRJEB25596             | <i>Ustilago trichophora</i>                                            | Phytopathogenic | 3  |
| PRJNA51263             | <i>Verticillium albo-atrum</i> = <i>Verticillium alfalfae</i> VaMs.102 | Phytopathogenic | 8  |
| PRJNA28529/PRJNA225532 | <i>Verticillium dhaliae</i> VdLs.17                                    | Phytopathogenic | 10 |
| PRJNA19047             | <i>Zymoseptoria tritici</i> IPO323                                     | Phytopathogenic | 8  |

**Supplementary Table 2.** BLASTp of the putative effector Pc123 LysM 1. There are similarities with sequences of entomopathogenic fungi.

| Description                                                                 | Max Score | Total Score | Query cover | E Value  | Per. Ident | Accession      |
|-----------------------------------------------------------------------------|-----------|-------------|-------------|----------|------------|----------------|
| hypothetical protein I1G_00006995 [ <i>Pochonia chlamydosporia</i> 123]     | 254       | 254         | 100%        | 2.00E-85 | 100.00     | RZR59939.1     |
| hypothetical protein VFPPC_13562 [ <i>Pochonia chlamydosporia</i> 170]      | 247       | 247         | 100%        | 2.00E-82 | 95.93      | XP_018144528.1 |
| LysM domain-containing protein [ <i>Metarhizium majus</i> ARSEF 297]        | 157       | 157         | 98%         | 3.00E-47 | 60.98      | KID94122.1     |
| LysM domain-containing protein [ <i>Metarhizium robertsii</i> ARSEF 23]     | 155       | 155         | 98%         | 2.00E-46 | 60.16      | XP_007824889.1 |
| LysM domain-containing protein [ <i>Metarhizium anisopliae</i> ]            | 155       | 155         | 97%         | 2.00E-46 | 60.66      | KFG81479.1     |
| hypothetical protein H634G_09367 [ <i>Metarhizium anisopliae</i> BRIP...]   | 155       | 155         | 98%         | 2.00E-46 | 60.98      | KJK75349.1     |
| LysM domain-containing protein [ <i>Metarhizium guizhouense</i> ARSEF...]   | 151       | 151         | 98%         | 1.00E-44 | 58.54      | KID84196.1     |
| LysM domain-containing protein [ <i>Metarhizium brunneum</i> ARSEF 3297]    | 150       | 150         | 99%         | 3.00E-44 | 59.68      | XP_014540510.1 |
| LysM domain-containing protein [ <i>Metarhizium anisopliae</i> ]            | 149       | 149         | 99%         | 6.00E-44 | 59.68      | KAF5128564.1   |
| LysM domain-containing protein [ <i>Metarhizium acridum</i> CQMa 102]       | 97.4      | 97.4        | 50%         | 1.00E-23 | 66.13      | XP_007812075.1 |
| LysM domain protein [ <i>Metarhizium majus</i> ARSEF 297]                   | 97.8      | 97.8        | 100%        | 2.00E-23 | 42.28      | KID95850.1     |
| carbohydrate-binding module family 50 protein [ <i>Bipolaris maydi</i> ...] | 103       | 307         | 80%         | 4.00E-23 | 52.48      | EMD87649.1     |
| LysM domain-containing protein [ <i>Metarhizium robertsii</i> ARSEF 23]     | 96.3      | 96.3        | 100%        | 8.00E-23 | 42.74      | XP_007822955.1 |
| LysM domain protein [ <i>Metarhizium guizhouense</i> ARSEF 977]             | 96.3      | 96.3        | 100%        | 9.00E-23 | 42.74      | KID83661.1     |
| LysM domain protein [ <i>Metarhizium rileyi</i> RCEF 4871]                  | 94.4      | 94.4        | 100%        | 3.00E-22 | 40.65      | OAA36463.1     |
| hypothetical protein H634G_05525 [ <i>Metarhizium anisopliae</i> BRIP...]   | 93.6      | 93.6        | 100%        | 7.00E-22 | 42.06      | KJK79285.1     |
| LysM domain protein [ <i>Metarhizium brunneum</i> ARSEF 3297]               | 93.6      | 93.6        | 99%         | 8.00E-22 | 42.74      | XP_014540927.1 |
| LysM domain-containing protein [ <i>Clathrospora elyinae</i> ]              | 93.2      | 142         | 80%         | 1.00E-21 | 48.00      | KAF1939262.1   |
| LysM domain-containing protein [ <i>Metarhizium anisopliae</i> ]            | 93.2      | 93.2        | 99%         | 1.00E-21 | 42.74      | KAF5137793.1   |
| carbohydrate-binding module family 50 protein [ <i>Alternaria sp.</i> ...]  | 95.5      | 219         | 80%         | 1.00E-21 | 50.50      | RII07040.1     |
| LysM domain protein [ <i>Metarhizium anisopliae</i> ]                       | 92.0      | 92.0        | 100%        | 3.00E-21 | 41.94      | KFG79524.1     |
| domain-containing [ <i>Pyrenophora seminiperda</i> CCB06]                   | 96.7      | 243         | 80%         | 6.00E-21 | 50.50      | RMZ69996.1     |
| hypothetical protein H634G_09266 [ <i>Metarhizium anisopliae</i> BRIP...]   | 97.4      | 189         | 68%         | 9.00E-21 | 61.19      | KJK75901.1     |
| hypothetical protein CC78DRAFT_470029 [ <i>Didymosphaeria enalia</i> ]      | 95.1      | 244         | 65%         | 1.00E-20 | 56.41      | KAF2261556.1   |
| LysM domain-containing protein [ <i>Metarhizium anisopliae</i> ARSEF 549]   | 96.7      | 185         | 69%         | 2.00E-20 | 62.69      | KID70238.1     |
| LysM domain-containing protein [ <i>Metarhizium majus</i> ARSEF 297]        | 95.5      | 177         | 58%         | 2.00E-20 | 57.75      | KID93431.1     |

|                                                                             |      |      |     |          |       |                |
|-----------------------------------------------------------------------------|------|------|-----|----------|-------|----------------|
| hypothetical protein BN1723_017532 [ <i>Verticillium longisporum</i> ]      | 87.8 | 87.8 | 52% | 3.00E-20 | 60.00 | CRK17424.1     |
| hypothetical protein AAL_00409 [ <i>Moelleriella libera</i> RCEF 2490]      | 95.9 | 261  | 60% | 3.00E-20 | 60.29 | OAA32944.1     |
| LysM domain-containing protein [ <i>Ophiocordyceps sinensis</i> CO18]       | 93.6 | 93.6 | 58% | 4.00E-20 | 56.94 | EQK98115.1     |
| LysM domain-containing protein [ <i>Metarhizium anisopliae</i> ]            | 94.0 | 175  | 58% | 5.00E-20 | 56.34 | KFG84795.1     |
| carbohydrate-binding module family 50 protein [ <i>Bipolaris...</i> ]       | 94.4 | 301  | 52% | 9.00E-20 | 64.62 | XP_014561981.1 |
| carbohydrate-binding module family 50 protein [ <i>Bipolaris zeico...</i> ] | 94.4 | 302  | 52% | 9.00E-20 | 64.62 | XP_007712024.1 |
| hypothetical protein CP532_2862 [ <i>Ophiocordyceps sp...</i> ]             | 87.4 | 87.4 | 52% | 9.00E-20 | 56.25 | RDA83600.1     |
| hypothetical protein H633G_10937 [ <i>Metarhizium anisopliae</i> BRIP...]   | 91.7 | 178  | 69% | 1.00E-19 | 61.19 | KJK85229.1     |
| LysM domain protein [ <i>Metarhizium robertsii</i> ARSEF 23]                | 94.0 | 185  | 68% | 1.00E-19 | 60.00 | XP_007816619.2 |
| hypothetical protein EK21DRAFT_71272 [ <i>Setomelanomma holmii</i> ]        | 86.7 | 86.7 | 52% | 2.00E-19 | 58.46 | KAF2027753.1   |
| LysM domain protein [ <i>Metarhizium majus</i> ARSEF 297]                   | 88.2 | 88.2 | 52% | 3.00E-19 | 56.92 | KID99357.1     |
| LysM domain-containing protein [ <i>Pochonia chlamydosporia</i> 170]        | 92.0 | 172  | 52% | 3.00E-19 | 63.08 | XP_018138330.1 |
| LysM domain-containing protein [ <i>Colletotrichum siamense</i> ]           | 91.7 | 244  | 65% | 3.00E-19 | 52.38 | KAF4806639.1   |
| uncharacterized protein E0L32_002377 [ <i>Phialemoniopsis curvata</i> ]     | 90.1 | 145  | 58% | 4.00E-19 | 58.33 | XP_030988592.1 |
| LysM domain protein [ <i>Metarhizium robertsii</i> ARSEF 23]                | 91.7 | 150  | 52% | 4.00E-19 | 60.00 | XP_007816348.1 |
| LysM domain-containing protein [ <i>Colletotrichum siamense</i> ]           | 91.7 | 244  | 65% | 4.00E-19 | 52.38 | KAF5497100.1   |
| LysM domain-containing protein [ <i>Metarhizium guizhouense</i> ARSEF...]   | 87.8 | 163  | 69% | 4.00E-19 | 51.19 | KID86630.1     |
| LysM domain-containing protein [ <i>Pochonia chlamydosporia</i> 170]        | 89.7 | 154  | 58% | 4.00E-19 | 55.56 | XP_018148099.1 |
| lysM domain-containing protein [ <i>Colletotrichum asianum</i> ]            | 91.3 | 242  | 65% | 5.00E-19 | 51.19 | KAF0325696.1   |
| LysM domain-containing protein [ <i>Metarhizium anisopliae</i> ]            | 91.7 | 172  | 58% | 5.00E-19 | 56.34 | KFG83697.1     |
| hypothetical protein AG0111_0g3723 [ <i>Alternaria gaisen</i> ]             | 92.0 | 274  | 73% | 5.00E-19 | 60.00 | KAB2107892.1   |
| LysM domain-containing protein [ <i>Colletotrichum fructicola</i> ]         | 91.3 | 244  | 58% | 5.00E-19 | 61.54 | KAF4907864.1   |
| LysM domain-containing protein [ <i>Colletotrichum fructicola</i> ]         | 91.3 | 244  | 63% | 6.00E-19 | 61.54 | XP_031893612.1 |
| hypothetical protein AA0117_g1798 [ <i>Alternaria alternata</i> ]           | 92.0 | 274  | 73% | 6.00E-19 | 60.00 | RYN81762.1     |

**Supplementary Table 3.** BLASTp of the putative effector Pc123 LysM 2. There are similarities with sequences of entomopathogenic fungi.

| Description                                                                 | Max Score | Total Score | Query cover | E Value   | Per. Ident | Accession      |
|-----------------------------------------------------------------------------|-----------|-------------|-------------|-----------|------------|----------------|
| hypothetical protein I1G_00011514 [ <i>Pochonia chlamydosporia</i> 123]     | 783       | 783         | 100%        | 0.0       | 100.00     | RZR67276.1     |
| hypothetical protein ED733_002102 [ <i>Metarhizium rileyi</i> ]             | 526       | 526         | 100%        | 0.0       | 67.19      | TWU72501.1     |
| LysM domain-containing protein [ <i>Metarhizium rileyi</i> RCEF 4871]       | 525       | 525         | 100%        | 0.0       | 67.19      | OAA42199.1     |
| LysM domain-containing protein [ <i>Metarhizium anisopliae</i> ARSEF 549]   | 473       | 473         | 90%         | 3.00E-164 | 64.58      | KID64046.1     |
| hypothetical protein MANI_010103 [ <i>Metarhizium anisopliae</i> ]          | 433       | 433         | 90%         | 4.00E-149 | 63.48      | KFG84780.1     |
| LysM domain-containing protein [ <i>Metarhizium robertsii</i> ARSEF 23]     | 407       | 612         | 94%         | 2.00E-136 | 56.10      | XP_007826696.2 |
| LysM domain protein [ <i>Metarhizium robertsii</i> ARSEF 23]                | 393       | 393         | 96%         | 4.00E-132 | 51.83      | XP_007817838.1 |
| LysM domain-containing protein [ <i>Metarhizium album</i> ARSEF 1941]       | 347       | 558         | 100%        | 4.00E-115 | 71.30      | KHO00987.1     |
| LysM domain-containing protein [ <i>Beauveria bassiana</i> ARSEF 2860]      | 325       | 325         | 97%         | 3.00E-105 | 44.00      | XP_008602669.1 |
| hypothetical protein BB8028_0006g01120 [ <i>Beauveria bassiana</i> ]        | 323       | 323         | 97%         | 2.00E-104 | 43.36      | PQK15790.1     |
| LysM domain protein [ <i>Metarhizium robertsii</i> ]                        | 323       | 323         | 98%         | 2.00E-104 | 42.93      | EXU97556.1     |
| LysM domain-containing protein [ <i>Beauveria bassiana</i> ]                | 323       | 323         | 97%         | 2.00E-104 | 43.75      | KAF1738191.1   |
| LysM domain-containing protein [ <i>Cordyceps javanica</i> ]                | 316       | 316         | 97%         | 5.00E-102 | 43.80      | TQV92266.1     |
| LysM domain-containing protein [ <i>Metarhizium majus</i> ARSEF 297]        | 316       | 316         | 99%         | 8.00E-102 | 41.65      | KID93431.1     |
| LysM domain-containing protein [ <i>Cordyceps javanica</i> ]                | 314       | 314         | 95%         | 6.00E-101 | 42.01      | TQW00740.1     |
| LysM domain-containing protein [ <i>Beauveria bassiana</i> ]                | 307       | 307         | 93%         | 2.00E-98  | 43.52      | PMB73899.1     |
| hypothetical protein BBAD15_g11618 [ <i>Beauveria bassiana</i> D1-5]        | 308       | 308         | 93%         | 9.00E-98  | 44.01      | KGQ03153.1     |
| LysM domain protein [ <i>Metarhizium robertsii</i> ARSEF 23]                | 306       | 306         | 98%         | 1.00E-97  | 37.87      | XP_007816291.1 |
| LysM domain-containing protein [ <i>Cordyceps javanica</i> ]                | 304       | 304         | 96%         | 8.00E-97  | 40.44      | TQV90962.1     |
| hypothetical protein RJ55_03944 [ <i>Drechmeria coniospora</i> ]            | 300       | 300         | 98%         | 2.00E-95  | 39.80      | ODA80984.1     |
| LysM domain-containing protein [ <i>Drechmeria coniospora</i> ]             | 300       | 300         | 98%         | 2.00E-95  | 39.80      | KYK61220.1     |
| LysM domain protein [ <i>Metarhizium robertsii</i> ARSEF 23]                | 310       | 310         | 95%         | 8.00E-95  | 42.45      | XP_007816619.2 |
| Peptidoglycan-binding lysin domain protein [ <i>Metarhizium rileyi</i> ...] | 295       | 295         | 88%         | 9.00E-94  | 43.87      | OAA36493.1     |
| LysM domain-containing protein [ <i>Pochonia chlamydosporia</i> 170]        | 293       | 293         | 87%         | 9.00E-93  | 41.55      | XP_018138330.1 |
| hypothetical protein G6O67_007750 [ <i>Ophiocordyceps sinensis</i> ]        | 288       | 288         | 83%         | 4.00E-92  | 47.47      | KAF4505840.1   |
| LysM domain-containing protein [ <i>Metarhizium anisopliae</i> ]            | 291       | 291         | 95%         | 5.00E-92  | 37.94      | KFG83697.1     |

|                                                                           |     |     |     |          |       |                |
|---------------------------------------------------------------------------|-----|-----|-----|----------|-------|----------------|
| LysM domain-containing protein [ <i>Metarhizium brunneum</i> ARSEF 3297]  | 286 | 286 | 98% | 2.00E-90 | 38.80 | XP_014540740.1 |
| LysM domain protein [ <i>Metarhizium robertsii</i> ARSEF 23]              | 286 | 286 | 84% | 3.00E-90 | 44.25 | XP_007816348.1 |
| LysM domain-containing protein [ <i>Metarhizium guizhouense</i> ARSEF...] | 285 | 285 | 98% | 9.00E-90 | 36.63 | KID82718.1     |
| LysM domain-containing protein [ <i>Pochonia chlamydosporia</i> 170]      | 270 | 345 | 84% | 6.00E-86 | 50.20 | XP_018148099.1 |
| LysM domain protein [ <i>Cordyceps fumosorosea</i> ARSEF 2679]            | 273 | 273 | 68% | 1.00E-85 | 47.60 | XP_018700253.1 |
| LysM domain-containing protein [ <i>Pochonia chlamydosporia</i> 170]      | 270 | 270 | 87% | 1.00E-84 | 41.94 | XP_018141296.1 |
| LysM domain-containing protein [ <i>Beauveria bassiana</i> ]              | 268 | 353 | 90% | 1.00E-83 | 48.00 | KAF1734749.1   |
| LysM domain-containing protein [ <i>Beauveria bassiana</i> ARSEF 2860]    | 268 | 268 | 67% | 3.00E-83 | 48.00 | XP_008602298.1 |
| LysM domain protein [ <i>Cordyceps militaris</i> ]                        | 266 | 266 | 68% | 2.00E-82 | 47.23 | ATY61716.1     |
| LysM domain protein [ <i>Cordyceps militaris</i> CM01]                    | 264 | 264 | 68% | 8.00E-82 | 46.86 | XP_006674317.1 |
| hypothetical protein H633G_10937 [ <i>Metarhizium anisopliae</i> BRIP...] | 258 | 330 | 90% | 8.00E-81 | 47.17 | KJK85229.1     |
| LysM domain-containing protein [ <i>Ophiocordyceps sinensis</i> CO18]     | 256 | 340 | 96% | 1.00E-79 | 46.82 | EQL03084.1     |
| LysM domain-containing protein [ <i>Metarhizium guizhouense</i> ARSEF...] | 256 | 256 | 76% | 1.00E-79 | 45.42 | KID91348.1     |
| LysM domain protein [ <i>Akanthomyces lecanii</i> RCEF 1005]              | 262 | 422 | 92% | 1.00E-79 | 39.57 | OAA81565.1     |
| hypothetical protein H634G_00888 [ <i>Metarhizium anisopliae</i> BRIP...] | 254 | 330 | 84% | 3.00E-79 | 47.15 | KJK83655.1     |
| LysM domain-containing protein [ <i>Metarhizium anisopliae</i> ]          | 264 | 264 | 79% | 3.00E-78 | 39.88 | KAF5126396.1   |
| LysM domain-containing protein [ <i>Metarhizium anisopliae</i> ]          | 249 | 249 | 81% | 2.00E-76 | 40.19 | KFG84795.1     |
| LysM domain protein [ <i>Cordyceps militaris</i> ]                        | 245 | 375 | 92% | 7.00E-73 | 37.40 | ATY67158.1     |
| LysM domain-containing protein [ <i>Cordyceps javanica</i> ]              | 241 | 241 | 89% | 1.00E-72 | 39.39 | TQV97459.1     |
| LysM domain protein [ <i>Cordyceps militaris</i> CM01]                    | 238 | 238 | 89% | 2.00E-71 | 36.61 | XP_006670025.1 |
| LysM domain protein [ <i>Cordyceps militaris</i> ]                        | 236 | 236 | 89% | 9.00E-71 | 36.86 | ATY65222.1     |
| LysM domain-containing protein [ <i>Metarhizium anisopliae</i> ARSEF 549] | 240 | 311 | 86% | 1.00E-69 | 46.00 | KID70238.1     |
| LysM domain protein [ <i>Cordyceps fumosorosea</i> ARSEF 2679]            | 224 | 224 | 89% | 6.00E-66 | 36.39 | XP_018708429.1 |
| hypothetical protein H634G_06422 [ <i>Metarhizium anisopliae</i> BRIP...] | 221 | 221 | 83% | 2.00E-65 | 35.56 | KJK78249.1     |

**Supplementary Table 4.** BLASTp of the putative effector Pc123 LysM 3. There are hardly any significant similarities with sequences of other fungi, but saprophytic fungi are among them.

| Description                                                               | Max Score | Total Score | Query cover | E Value   | Per. Ident | Accession      |
|---------------------------------------------------------------------------|-----------|-------------|-------------|-----------|------------|----------------|
| hypothetical protein I1G_00007068 [ <i>Pochonia chlamydosporia</i> 123]   | 1363      | 1363        | 100%        | 0.0       | 100.00     | RZR69809.1     |
| hypothetical protein FDECE_9300 [ <i>Fusarium decemcellulare</i> ]        | 473       | 521         | 86%         | 3.00E-156 | 48.01      | KAF5004162.1   |
| hypothetical protein CNMCM6936_002900 [ <i>Aspergillus lentulus</i> ]     | 428       | 428         | 98%         | 2.00E-137 | 38.31      | KAF4161886.1   |
| hypothetical protein H101_00782 [ <i>Trichophyton interdigitale</i> H6]   | 414       | 414         | 99%         | 3.00E-132 | 35.46      | EZF35683.1     |
| Carbohydrate-binding module family 50 protein [ <i>Trichophyton...</i> ]  | 412       | 412         | 97%         | 3.00E-131 | 35.81      | KAF3898088.1   |
| LysM domain-containing protein [ <i>Beauveria bassiana</i> ARSEF 2860]    | 423       | 423         | 99%         | 3.00E-130 | 36.45      | XP_008602577.1 |
| uncharacterized protein ANOM_000100 [ <i>Aspergillus nomiae</i> NRRL...]  | 399       | 399         | 99%         | 3.00E-125 | 35.06      | XP_015412422.1 |
| LysM domain-containing protein [ <i>Cordyceps fumosorosea</i> ARSEF 2679] | 410       | 410         | 99%         | 3.00E-125 | 35.70      | XP_018705634.1 |
| uncharacterized protein CPUR_06019 [ <i>Claviceps purpurea</i> 20.1]      | 391       | 391         | 99%         | 4.00E-123 | 35.21      | CCE32159.1     |
| hypothetical protein DSM5745_03923 [ <i>Aspergillus mulundensis</i> ]     | 385       | 385         | 98%         | 7.00E-121 | 35.43      | XP_026604935.1 |
| uncharacterized protein CPUR_06013 [ <i>Claviceps purpurea</i> 20.1]      | 378       | 378         | 98%         | 4.00E-118 | 34.87      | CCE32153.1     |
| hypothetical protein AFLA70_31g004611 [ <i>Aspergillus flavus</i> AF70]   | 374       | 374         | 99%         | 1.00E-115 | 33.12      | KOC07375.1     |
| hypothetical protein COH20_002678 [ <i>Aspergillus flavus</i> ]           | 371       | 371         | 99%         | 1.00E-114 | 33.12      | RAQ66490.1     |
| LysM domain-containing protein [ <i>Blastomyces dermatitidis</i> ATCC...] | 362       | 411         | 92%         | 8.00E-113 | 35.96      | EGE82987.2     |
| LysM domain-containing protein [ <i>Blastomyces gilchristii</i> SLH14081] | 361       | 410         | 92%         | 1.00E-112 | 35.96      | XP_031580869.1 |
| hypothetical protein GE09DRAFT_1090733 [ <i>Coniochaeta sp.</i> 2T2.1]    | 360       | 360         | 98%         | 2.00E-110 | 33.88      | KAB5578705.1   |
| hypothetical protein GX50_01673 [ <i>Emmonsia crescens</i> ]              | 353       | 400         | 90%         | 3.00E-109 | 35.79      | PGH35458.1     |
| hypothetical protein EMCG_05303 [ <i>Emmonsia crescens</i> UAMH 3008]     | 352       | 400         | 90%         | 4.00E-109 | 35.62      | KKZ59917.1     |
| uncharacterized protein C285.05 [ <i>Aspergillus udagawae</i> ]           | 356       | 472         | 98%         | 2.00E-105 | 35.21      | GAO90519.1     |
| hypothetical protein EMPG_12392 [ <i>Blastomyces silverae</i> ]           | 342       | 390         | 90%         | 3.00E-105 | 36.79      | KLJ12564.1     |
| hypothetical protein CNMCM6936_004141 [ <i>Aspergillus lentulus</i> ]     | 351       | 394         | 98%         | 8.00E-105 | 35.12      | KAF4160012.1   |
| LysM domain-containing protein [ <i>Colletotrichum graminicola...</i> ]   | 346       | 346         | 98%         | 1.00E-104 | 33.21      | XP_008100462.1 |
| glutamate decarboxylase [ <i>Blastomyces parvus</i> ]                     | 352       | 400         | 97%         | 4.00E-104 | 34.72      | PGH07488.1     |
| LysM domain-containing protein [ <i>Colletotrichum siamense</i> ]         | 343       | 343         | 99%         | 7.00E-104 | 32.18      | KAF4811551.1   |
| hypothetical protein BDV28DRAFT_132335 [ <i>Aspergillus...</i> ]          | 342       | 415         | 94%         | 2.00E-103 | 34.93      | KAE8353839.1   |



|                                                                             |     |     |      |           |       |                |
|-----------------------------------------------------------------------------|-----|-----|------|-----------|-------|----------------|
| LysM domain-containing protein [ <i>Beauveria brongniartii</i> RCEF 3172]   | 349 | 349 | 83%  | 2.00E-103 | 37.88 | OAA37535.1     |
| uncharacterized protein CGMCC3_g9789 [ <i>Colletotrichum fructicola</i> ]   | 342 | 342 | 99%  | 2.00E-103 | 32.40 | XP_031883631.1 |
| carbohydrate-binding module family 50 protein [ <i>Lepidopterella...</i> ]  | 340 | 340 | 100% | 7.00E-103 | 34.43 | OCK74384.1     |
| hypothetical protein GE09DRAFT_1127203 [ <i>Coniochaeta sp.</i> 2T2.1]      | 341 | 525 | 100% | 7.00E-103 | 33.82 | KAB5549646.1   |
| LysM domain-containing protein [ <i>Colletotrichum fructicola</i> ]         | 341 | 341 | 99%  | 8.00E-103 | 32.27 | KAF4908481.1   |
| carbohydrate-binding module family 50 protein [ <i>Amniculicola...</i> ]    | 337 | 337 | 100% | 3.00E-102 | 32.76 | KAF2000149.1   |
| carbohydrate-binding module family 50 protein [ <i>Daldinia sp.</i> EC12]   | 336 | 336 | 98%  | 1.00E-101 | 34.18 | OTB16721.1     |
| hypothetical protein CA14_011665 [ <i>Aspergillus flavus</i> ]              | 333 | 333 | 83%  | 2.00E-101 | 36.69 | RMZ37364.1     |
| LysM domain-containing protein [ <i>Colletotrichum gloeosporioides</i> ]    | 336 | 336 | 99%  | 4.00E-101 | 32.19 | KAF3811932.1   |
| carbohydrate-binding module family 50 protein [ <i>Zopfia rhizophi...</i> ] | 335 | 335 | 98%  | 5.00E-101 | 33.20 | KAF2175650.1   |
| LysM domain-containing protein [ <i>Colletotrichum siamense</i> ]           | 335 | 335 | 99%  | 9.00E-101 | 31.94 | KAF5510816.1   |
| carbohydrate-binding module family 50 protein [ <i>Polychaeton cit...</i> ] | 334 | 334 | 97%  | 2.00E-100 | 32.73 | KAF2716075.1   |
| hypothetical protein PspLS_09235 [ <i>Pyricularia sp.</i> CBS 133598]       | 337 | 550 | 99%  | 4.00E-100 | 40.94 | TLD21139.1     |
| hypothetical protein BDZ85DRAFT_301033 [ <i>Elsinoe ampelina</i> ]          | 333 | 458 | 98%  | 7.00E-100 | 34.27 | KAF2228098.1   |
| hypothetical protein E8E14_003574 [ <i>Neopestalotiopsis sp.</i> 37M]       | 329 | 329 | 83%  | 1.00E-99  | 38.01 | KAF3002147.1   |
| hypothetical protein ASPZODRAFT_105672 [ <i>Penicillium zonata...</i> ]     | 327 | 379 | 87%  | 1.00E-99  | 35.79 | XP_022576650.1 |
| carbohydrate-binding module family 50 protein [ <i>Periconia...</i> ]       | 327 | 486 | 97%  | 2.00E-99  | 36.39 | PVI08691.1     |
| hypothetical protein PENSTE_c040G07912 [ <i>Penicillium steckii</i> ]       | 332 | 376 | 93%  | 2.00E-99  | 33.44 | OQE13960.1     |
| hypothetical protein DL770_005977 [ <i>Monosporascus sp.</i> CRB-9-2]       | 330 | 473 | 100% | 2.00E-98  | 33.64 | RYP81114.1     |
| LysM domain-containing protein [ <i>Colletotrichum siamense</i> ]           | 327 | 327 | 99%  | 1.00E-97  | 31.98 | KAF4851722.1   |
| hypothetical protein PENANT_c016G05375 [ <i>Penicillium antarcticum</i> ]   | 327 | 449 | 98%  | 1.00E-97  | 34.15 | OQD83602.1     |
| LysM domain-containing protein [ <i>Colletotrichum aenigma</i> ]            | 326 | 326 | 99%  | 2.00E-97  | 32.05 | KAF5525599.1   |
| LysM domain-containing protein [ <i>Colletotrichum siamense</i> ]           | 326 | 326 | 99%  | 3.00E-97  | 31.90 | KAF4875198.1   |
| Peptidoglycan-binding lysin domain [ <i>Penicillium roqueforti</i> FM164]   | 326 | 447 | 98%  | 3.00E-97  | 34.38 | CDM37952.1     |
| hypothetical protein PENARI_c008G09124 [ <i>Penicillium arizonense</i> ]    | 326 | 370 | 90%  | 4.00E-97  | 35.00 | XP_022488860.1 |

**Supplementary Table 5.** BLASTp of the putative effector Pc123 LysM 4. There are similarities with sequences of phytopathogenic fungi.

| Description                                                                  | Max Score | Total Score | Query cover | E Value  | Per. Ident | Accession      |
|------------------------------------------------------------------------------|-----------|-------------|-------------|----------|------------|----------------|
| hypothetical protein IIG_00010864 [ <i>Pochonia chlamydosporia</i> 123]      | 1161      | 1161        | 100%        | 0.0      | 100.00     | RZR58789.1     |
| lysM domain-containing protein [ <i>Pochonia chlamydosporia</i> 170]         | 1124      | 1124        | 100%        | 0.0      | 95.78      | XP_018137526.2 |
| hypothetical protein ASPZODRAFT_162157 [ <i>Penicillioptosis zonata</i> ...] | 566       | 630         | 97%         | 0.0      | 52.61      | XP_022577051.1 |
| LysM domain-containing protein [ <i>Colletotrichum siamense</i> ]            | 546       | 546         | 95%         | 0.0      | 52.02      | KAF4837432.1   |
| LysM domain-containing protein [ <i>Colletotrichum gloeosporioides</i> ]     | 544       | 741         | 98%         | 0.0      | 51.10      | KAF3809926.1   |
| LysM domain-containing protein [ <i>Colletotrichum siamense</i> ]            | 543       | 741         | 99%         | 0.0      | 51.61      | KAF4823116.1   |
| hypothetical protein CI238_10075 [ <i>Colletotrichum incanum</i> ]           | 542       | 623         | 97%         | 0.0      | 52.82      | KZL82752.1     |
| LysM domain-containing protein [ <i>Colletotrichum incanum</i> ]             | 540       | 666         | 95%         | 0.0      | 52.75      | OHW97901.1     |
| LysM domain-containing protein [ <i>Colletotrichum tropicale</i> ]           | 540       | 739         | 99%         | 0.0      | 51.43      | KAF4835201.1   |
| LysM domain-containing protein [ <i>Colletotrichum siamense</i> ]            | 540       | 737         | 99%         | 0.0      | 51.44      | KAF5506626.1   |
| LysM domain-containing protein [ <i>Colletotrichum aenigma</i> ]             | 539       | 737         | 97%         | 0.0      | 51.44      | KAF5524229.1   |
| LysM domain-containing protein [ <i>Colletotrichum gloeosporioides</i> ...]  | 538       | 680         | 93%         | 0.0      | 51.64      | EQB55337.1     |
| carbohydrate-binding protein [ <i>Colletotrichum asianum</i> ]               | 537       | 730         | 99%         | 0.0      | 51.35      | KAF0327803.1   |
| LysM domain-containing protein [ <i>Colletotrichum viniferum</i> ]           | 536       | 727         | 97%         | 0.0      | 49.92      | KAF4930678.1   |
| a13e5e8b-a26f-4556-a097-00630ad892c5 [ <i>Thermothielavioides</i> ...]       | 536       | 729         | 97%         | 0.0      | 52.60      | SPQ23050.1     |
| uncharacterized protein CGMCC3_g12747 [ <i>Colletotrichum fructicola</i> ]   | 535       | 728         | 97%         | 200E-180 | 49.92      | XP_031880753.1 |
| hypothetical protein CHGG_03555 [ <i>Chaetomium globosum</i> CBS 148.51]     | 517       | 517         | 95%         | 100E-173 | 49.22      | XP_001230071.1 |
| carbohydrate-binding module family 50 protein...                             | 500       | 500         | 95%         | 300E-167 | 50.86      | XP_003655009.1 |
| hypothetical protein B5807_02521 [ <i>Epicoccum nigrum</i> ]                 | 451       | 451         | 99%         | 100E-148 | 43.16      | OSS52543.1     |
| carbohydrate-binding module family 50 protein [ <i>Bipolaris</i> ...]        | 434       | 434         | 99%         | 800E-142 | 44.05      | XP_014562094.1 |
| hypothetical protein COCC4DRAFT_193590 [ <i>Bipolaris maydis</i> ATCC...]    | 431       | 431         | 99%         | 100E-140 | 43.89      | XP_014080199.1 |
| LysM domain-containing protein [ <i>Colletotrichum tropicale</i> ]           | 416       | 416         | 97%         | 200E-135 | 43.20      | KAF4828357.1   |
| carbohydrate-binding module family 50 protein [ <i>Bipolaris</i> ...]        | 416       | 416         | 96%         | 800E-135 | 39.73      | XP_007705696.1 |
| hypothetical protein CI238_06532 [ <i>Colletotrichum incanum</i> ]           | 412       | 539         | 99%         | 400E-134 | 41.95      | KZL80226.1     |
| carbohydrate-binding module family 50 protein [ <i>Amniculicola</i> ...]     | 413       | 413         | 98%         | 600E-134 | 39.67      | KAF2007436.1   |
| LysM domain-containing protein [ <i>Colletotrichum siamense</i> ]            | 409       | 409         | 99%         | 100E-132 | 43.24      | KAF4869936.1   |

|                                                                             |     |     |     |           |       |                |
|-----------------------------------------------------------------------------|-----|-----|-----|-----------|-------|----------------|
| hypothetical protein EJ07DRAFT_82962 [ <i>Lizonia empirigonia</i> ]         | 408 | 529 | 96% | 100E-132  | 44.83 | KAF1359810.1   |
| lysM domain-containing protein [ <i>Colletotrichum asianum</i> ]            | 409 | 409 | 99% | 200E-132  | 43.57 | KAF0325192.1   |
| LysM domain-containing protein [ <i>Colletotrichum incanum</i> ]            | 408 | 535 | 99% | 200E-132  | 41.78 | OHW96268.1     |
| LysM domain-containing protein [ <i>Colletotrichum siamense</i> ]           | 408 | 408 | 99% | 200E-132  | 43.57 | KAF4844231.1   |
| LysM domain-containing protein [ <i>Colletotrichum aenigma</i> ]            | 408 | 408 | 99% | 300E-132  | 43.41 | KAF5526534.1   |
| LysM domain-containing protein [ <i>Colletotrichum siamense</i> ]           | 405 | 405 | 99% | 600E-131  | 43.07 | KAF4820443.1   |
| LysM domain-containing protein [ <i>Colletotrichum gloeosporioides</i> ]    | 399 | 399 | 99% | 600E-129  | 42.50 | KAF3805423.1   |
| LysM domain-containing protein [ <i>Colletotrichum fructicola</i> Nara...]  | 399 | 399 | 99% | 700E-129  | 42.74 | KAF4482207.1   |
| LysM domain-containing protein [ <i>Colletotrichum gloeosporioides</i> ...] | 399 | 399 | 99% | 200E-128  | 42.33 | EQB55038.1     |
| LysM domain-containing protein [ <i>Colletotrichum tofieldiae</i> ]         | 397 | 665 | 97% | 700E-127  | 43.46 | KZL74226.1     |
| peptidoglycan-binding protein [ <i>Akanthomyces lecanii</i> RCEF 1005]      | 390 | 598 | 96% | 800E-127  | 47.63 | OAA74801.1     |
| hypothetical protein CONLIGDRAFT_719454 [ <i>Coniochaeta ligniaria</i> ...] | 384 | 553 | 99% | 800E-122  | 43.28 | OIW22890.1     |
| hypothetical protein E8E14_007637 [ <i>Neopestalotiopsis sp.</i> 37M]       | 381 | 731 | 99% | 900E-121  | 41.54 | KAF3002842.1   |
| LysM domain-containing protein [ <i>Microsporium canis</i> CBS 113480]      | 376 | 482 | 99% | 200E-120  | 40.42 | XP_002848485.1 |
| hypothetical protein V492_08531 [ <i>Pseudogymnoascus sp.</i> VKM F-4246]   | 370 | 622 | 94% | 100E-118  | 42.89 | KFY05463.1     |
| peptidoglycan-binding protein [ <i>Sporothrix insectorum</i> RCEF 264]      | 376 | 459 | 99% | 300E-118  | 40.70 | OAA63388.1     |
| hypothetical protein V494_04919 [ <i>Pseudogymnoascus sp.</i> VKM F-45...]  | 365 | 612 | 94% | 200E-116  | 41.78 | KFY36952.1     |
| hypothetical protein CHGG_09900 [ <i>Chaetomium globosum</i> CBS 148.51]    | 364 | 613 | 99% | 600E-115  | 41.20 | XP_001227827.1 |
| carbohydrate-binding module family 50 protein [ <i>Bipolaris zeico</i> ...] | 360 | 512 | 96% | 700E-115  | 45.36 | XP_007716749.1 |
| hypothetical protein V490_07063 [ <i>Pseudogymnoascus sp.</i> VKM F-3557]   | 356 | 640 | 97% | 200E-114  | 49.16 | KFX89378.1     |
| hypothetical protein V495_01788 [ <i>Pseudogymnoascus sp.</i> VKM F-45...]  | 356 | 640 | 97% | 300E-114  | 49.16 | KFY47843.1     |
| carbohydrate-binding module family 50 protein [ <i>Hypoxyton sp.</i> ...]   | 357 | 478 | 97% | 400E-114  | 45.88 | OTB01250.1     |
| hypothetical protein AJ79_08923 [ <i>Helicocarpus griseus</i> UAMH5409]     | 358 | 476 | 96% | 500E-114  | 41.88 | PGG98286.1     |
| carbohydrate-binding module family 50 protein [ <i>Bipolaris oryza</i> ...] | 353 | 461 | 96% | 4,00E-112 | 44.09 | XP_007692779.1 |

**Supplementary Table 6.** Percentage of model identity of the 4 putative LysM effectors of Pc123 when tested with different proteins.

| <b>Protein-Organism</b>               | <b>PDB ID</b> | <b>Pc123 Lys1</b> | <b>Pc123 Lys2</b> | <b>Pc123 Lys3</b> | <b>Pc123 Lys4</b> |
|---------------------------------------|---------------|-------------------|-------------------|-------------------|-------------------|
| Ecp6 <i>Cladosporium fulvum</i>       | 4B8V          | 21.74%            | 21.66%            | 42.00%            | 55.00%            |
| Chitinase A <i>Pteris ryukyuensis</i> | 4PXV          | 39.53%            | 45.65%            | 44.66%            | 38.30%            |
| Chitinase A <i>Equisetum arvense</i>  | 5BUM          | 32.43%            | 39.22%            | 36.73%            | 27.45%            |
| OsCEBiP <i>Oryza sativa</i>           | 5JCD          | -                 | -                 | 37.04%            | 22.22%            |

**Supplementary Table 7.** Primers used in qRT-PCR.

| Name           | Primer Sequence         | Length |
|----------------|-------------------------|--------|
| PcLys1b_F      | TTGCCAAGACTTTGCTCCTT    | 149 bp |
| PcLys1b_R      | TCGTTGTCGTTGTTGATGGT    |        |
| PcLys2a_F      | GGTATCACTCCGGCTTTTGA    | 72 bp  |
| PcLys2a_R      | GCTTCCGCTGGCAATAGTAG    |        |
| PcLys3c_F      | AACTCCGGCGTTAACAGAGA    | 235 bp |
| PcLys3c_R      | GTGAAGCTCGTCGAAGGAAC    |        |
| PcLys4a_F      | ACCCAAAAGACGTCGTCAAC    | 153 bp |
| PcLys4a_R      | GAGGTGACTGGGTTTCGTGT    |        |
| VCP1q_F        | GCCATCGTTGAGCAGCAG      |        |
| VCP1q_R        | ACCGTGACCGTCGTTGTTCT    |        |
| Btub_F (HK)    | TCCCTCGTCTGCACTTCTTCA   | 254 bp |
| Btub_R (HK)    | CCATTGACAAAGTAGGTCGAGTT |        |
| AllPerm_F (HK) | TCGGCATCAACATCATCCTA    | 94 bp  |
| AllPerm_R (HK) | CCCAGGATGAACCTGACAGT    |        |
| GADPH_F (HK)   | GCAACACCAACTCCTCCATC    | 79 bp  |
| GADPH_R (HK)   | TACCAGGAGACCAGCTTGAC    |        |

## **Supplementary Figure Legends**

### **Supplementary Figure 1. LysM domains of putative effectors of different organisms are grouped according to their way of life.**

Phylogeny of putative LysM effectors belonging to 27 different organisms, only LysM domains (232 in total). Phylogeny is grouped into lifestyles: endophytes, phytopathogens, both and others. Phylogenetic analysis was performed in MEGA X by aligning the sequences using ClustalW, with a Maximum Likelihood, 1500 Bootstraps, JTT method. Abbreviations are listed in Table 1.

**Supplementary Figure 2. Quality of protein models.** A, Pc123 Lys1 ProSa; B, Pc123 Lys1 “Rampage” Ramachandran data; C, Pc123 Lys2 ProSa; D, Pc123 Lys2 “Rampage” Ramachandran data; E, Pc123 Lys3 ProSa; B, Pc123 Lys3 “Rampage” Ramachandran data; F, Pc123 Lys4 ProSa; G, Pc123 Lys4 “Rampage” Ramachandran data.

**Supplementary Figure 3. Putative Pc123 LysM effectors are expressed in banana.** VCP1 (used as positive control) is overexpressed during root colonization. There were not found significant differences in putative LysM expression between banana roots colonized by Pc123 and Pc123 growing in minimal medium.
