# Supplementary figures and images for: Putative LysM Effectors Contribute to Fungal Lifestyle
Source: MDPI journal article supplement (doi:10.3390/ijms22063147), 2021-03-19

- ▼ Phytopathogenic  
■ Both  
▲ Endophytic  
◆ Others

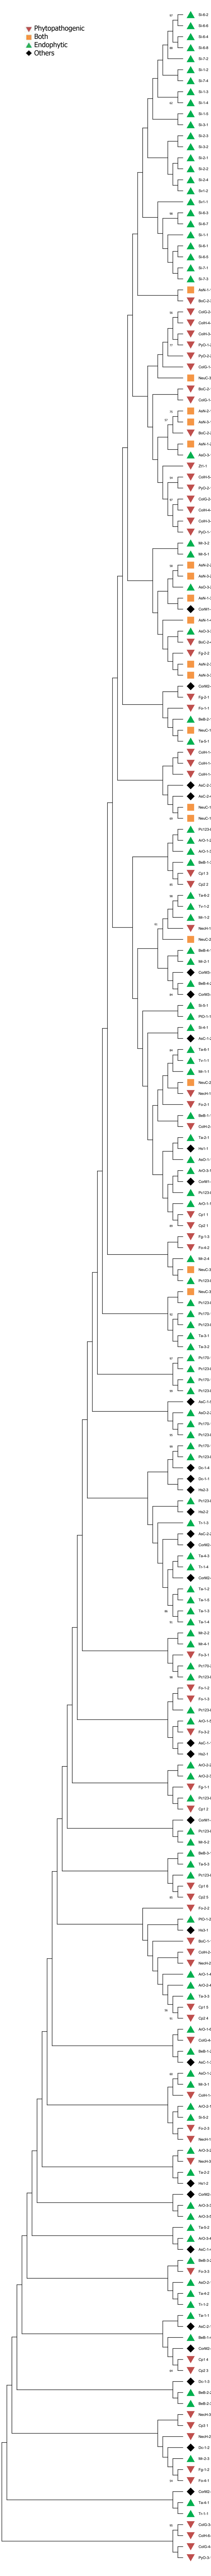

Supplement: s1 [file s1]
